# Supplementary material for: Multicenter study evaluating one multiplex RT-PCR assay to detect SARS-CoV-2, influenza A/B, and respiratory syncytia virus using the LabTurbo AIO open platform: epidemiological features, automated sample-to-result, and high-throughput testing
Source: publisher site journal article supplement (doi:10.18632/aging.203761), 2021-12-12
Supplement: Supplementary file [file aging-v13i23-203761-supplementary-material-SD1.pdf]

## SUPPLEMENTARY FIGURE

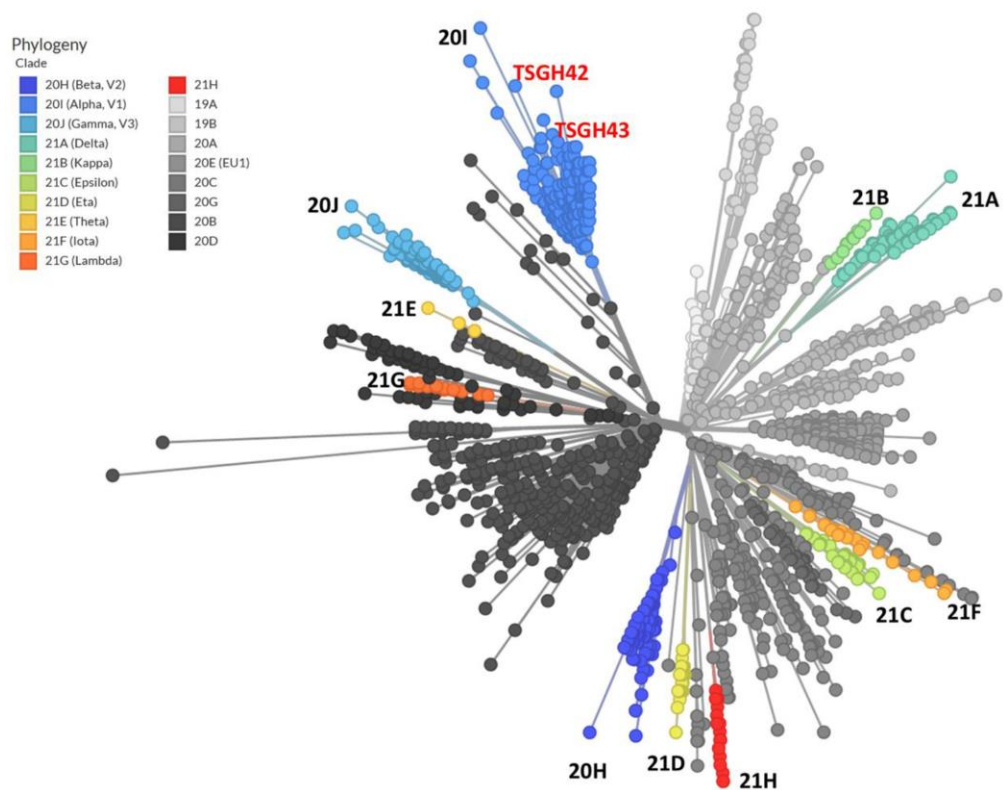

**Supplementary Figure 1. The clade of SARS-CoV-2 (TSGH42 and TSGH43) collected from retrospective positive specimens in this study. The clade belongs to SARS-CoV-2 B.1.1.7 variant (20I).**
